# Supplementary material for: Small-molecular iridium complex based organic solar cells with improved photovoltaic performance through device optimization
Source: Royal Society of Chemistry journal article supplement (doi:10.1039/d0tc00779j), 2020-01-01
Supplement: d0tc00779j1.pdf [file d0tc00779j1.pdf]

## Electronic Supplementary Information for

# Small-molecular Iridium complex based organic solar cells with improved photovoltaic performance through device optimization

Tianjian Yang,<sup>†a</sup> Xuyu Gao,<sup>†a</sup> Yinming He,<sup>a</sup> Huabin Wang,<sup>a</sup> Youtian Tao<sup>\*a</sup>

<sup>a</sup> Key lab for Flexible Electronics and Institute of Advance Materials, Jiangsu National Synergistic Innovation Center for Advanced Materials (SICAM), Nanjing Tech University, 30 South Puzhu Road, Nanjing 211816, People's Republic of China.

E-mail: iamyttao@njtech.edu.cn

<sup>†</sup> T. yang and X. Gao contributed equally to this work.

## Experimental

All solvents and chemicals were obtained commercially and used without further purification. CB and CF was purchased from Sigma Aldrich Co., PDCBT and P<sub>71</sub>BM from One-Materials Inc..

OSCs with conventional structure of ITO/PEDOT:PSS/active layer/PDINO/Al was fabricated as follows. Indium tin oxide (ITO) glass substrates were cleaned in an ultrasonic bath with detergent, deionized water, acetone and isopropanol, respectively, and followed by treatment of UV-ozone for 30 minutes. Then, PEDOT:PSS (Baytron PVP Al 4083) was spin-coated on the ITO at 3500 rpm for 60 seconds and baked at 150°C for 15 min in air to give a film thickness around 30 nm. After that, the substrates with PEDOT:PSS thin film were transferred to a nitrogen glove box. The blends of TBzIr:PC<sub>71</sub>BM was dissolved in CB solvent (D:A=1:1, 20 mg mL<sup>-1</sup>) anteriorly with stirring over 12 hours under 60°C. For ternary OSCs, blend of PDCBT:TBzIr:PC<sub>71</sub>BM was dissolved in CB:CF (3:1, v/v) mixed solvent (20 mg mL<sup>-1</sup> in total) with stirring over 12 hours under 50°C. Then, the completely dissolved solution was spin-coated onto the PEDOT:PSS layer to form the BHJ structure. And for PDCBT/TBzIr:PC<sub>71</sub>BM bilayer devices, PDCBT in CF solution with concentration of 6 mg mL<sup>-1</sup> was spin-coated followed by thermal annealing at 60°C for 10 minutes. The TBzIr:PC<sub>71</sub>BM active layer was fabricated in the same process with BHJ control mentioned above. A cathode buffer layer PDINO was then spin-coated at 3000 rpm for 60 seconds. Finally, aluminum with thickness of 100 nm was evaporated onto the PDINO layer under vacuum ( $\approx 10^{-5}$  Pa) as the back electrode.

Ultraviolet-visible (UV-vis) absorption spectra of thin film on a quartz substrate were measured using Shimadzu UV-2500 recording spectrophotometer. *J-V* curves of OSCs devices were measured using a computer controlled Keithley 2400 Source Measure Unit under a simulated AM 1.5G spectrum, which was obtained by Oriel Sol3A Class Solar Simulator (model, Enlitech SS-F5-3A) with a 450 W xenon lamp and an air mass 1.5 filter. EQE spectra was measured by Solar Cell Spectral Response Measurement System QE-R3-011 (Enli Technology, Taiwan). AFM measurement was performed via Bruker Dimension ICON atomic force microscopy. X-ray photoelectron spectroscopy (XPS): vertical distribution was characterized via Thermo ESCALAB 250XI, which using a excitation source of Al K $\alpha$  X-ray. To prepare the corresponding samples, the active layers were transferred into water bath for a separating process. Since the hole transport layer PEDOT:PSS was soluble well and PDCBT, TBzIr as well as PC<sub>71</sub>BM were insoluble in water, the active layer could be easily detached and then transferred to a small pieces of Si substrate.

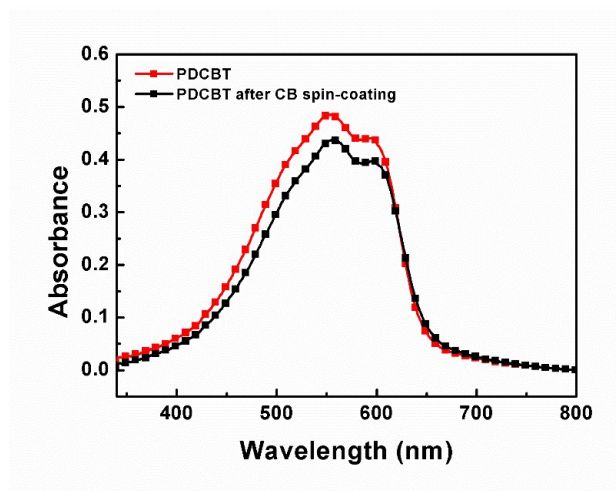

**Fig. S1** The UV absorbance of the PDCBT film before and after spin-coating of CB.

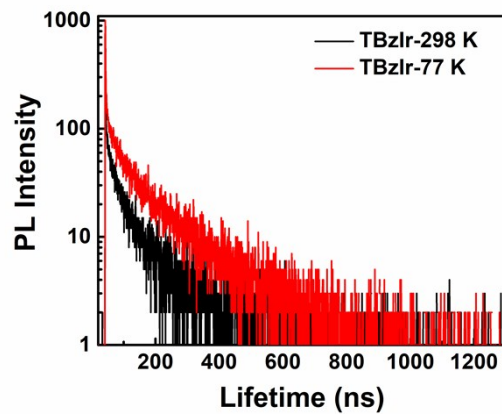

**Fig. S2** The transient PL decay curves under room and 77 K temperature for TBzIr films.

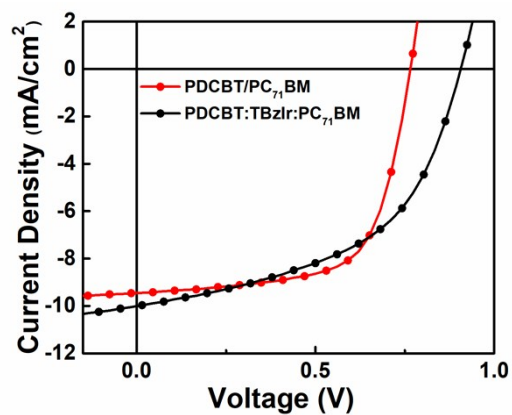

**Fig. S3** *J-V* curves of the PDCBT/PC<sub>71</sub>BM bilayer and PDCBT:TBzIr:PC<sub>71</sub>BM ternary OSCs devices.

**Table S1** Photovoltaic properties of PDCBT:TBzIr:PC<sub>71</sub>BM based devices with varying thickness of PDCBT layer.

| Thickness of PDCBT | V <sub>oc</sub> [V] | J <sub>sc</sub> [mA/cm <sup>2</sup> ] | FF   | PCE <sup>(a)</sup> [%] |
|--------------------|---------------------|---------------------------------------|------|------------------------|
| 23 nm              | 0.92                | 10.13                                 | 0.55 | 5.10 (4.92±0.09)       |
| 26 nm              | 0.92                | 10.11                                 | 0.56 | 5.19 (4.93±0.26)       |
| 39 nm              | 0.92                | 11.18                                 | 0.59 | 6.17 (5.84±0.33)       |
| 48 nm              | 0.92                | 10.85                                 | 0.59 | 5.78 (5.64±0.14)       |
| 57 nm              | 0.92                | 10.61                                 | 0.57 | 5.43 (5.34±0.11)       |
| 81 nm              | 0.92                | 10.66                                 | 0.48 | 4.50 (4.30±0.20)       |
| 91 nm              | 0.92                | 10.02                                 | 0.47 | 4.29 (3.99±0.30)       |
| 101 nm             | 0.92                | 9.19                                  | 0.44 | 3.66 (3.39±0.27)       |

<sup>a</sup> Statistical data obtained from 12 devices.

**Table S2** Photovoltaic parameters of the ternary OSCs.

| PDCBT:TBzIr:PC <sub>71</sub> BM<br>[wt%:wt%:wt%] | V <sub>oc</sub> [V] | J <sub>sc</sub> [mA/cm <sup>2</sup> ] | FF   | PCE <sup>(a)</sup> [%] |
|--------------------------------------------------|---------------------|---------------------------------------|------|------------------------|
| 0.05:1:1                                         | 0.86                | 8.51                                  | 0.37 | 2.31 (2.17±0.14)       |
| 0.1:1:1                                          | 0.89                | 9.44                                  | 0.42 | 3.58 (3.00±0.58)       |
| 0.2:1:1                                          | 0.89                | 9.49                                  | 0.43 | 3.54 (3.31±0.23)       |
| 0.3:1:1                                          | 0.89                | 9.99                                  | 0.44 | 3.67 (3.39±0.28)       |
| 0.4:1:1                                          | 0.89                | 10.05                                 | 0.51 | 4.62 (4.33±0.29)       |
| 0.5:1:1                                          | 0.89                | 9.21                                  | 0.45 | 3.70 (3.36±0.34)       |

<sup>a</sup> Statistical data obtained from 12 devices.

Calculation of the bottom surface compositions

$$\begin{aligned}
 & \frac{n_{\text{PCBM}}}{n_{\text{PCBM}} + n_{\text{TBzIr}}} \\
 \text{PC}_{71}\text{BM molar content} &= \frac{n_{\text{PCBM}}}{n_{\text{PCBM}} + n_{\text{TBzIr}}} \\
 2n_{\text{PCBM}} + 2n_{\text{TBzIr}} &= \text{O} \\
 n_{\text{TBzIr}} &= \text{Ir} \\
 \text{PC}_{71}\text{BM molar content} &= \frac{\text{O} - 2\text{Ir}}{\text{O}}
 \end{aligned}$$

$n_{\text{PCBM}}$  is the mole number of PC<sub>71</sub>BM

$n_{\text{TBzIr}}$  is the mole number of TBzIr

**O** and **Ir** stand for the proportion of corresponding atoms among the scanning depth

**Table S3** Atomic ratio of the bottom surface

|                                 | S [%] | O [%] | Ir [%] | C [%] |
|---------------------------------|-------|-------|--------|-------|
| TBzIr:PC <sub>71</sub> BM       | 6.63  | 8.80  | 0.83   | 83.74 |
| PDCBT/TBzIr:PC <sub>71</sub> BM | 8.70  | 8.71  | -      | 82.59 |
